# Supplementary material
Source: PubMed Central journal article supplement (PMC1420669)

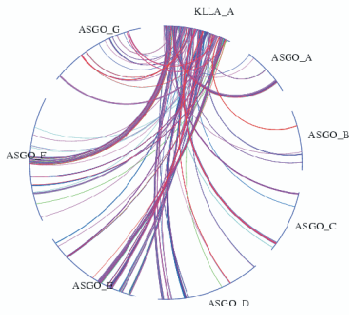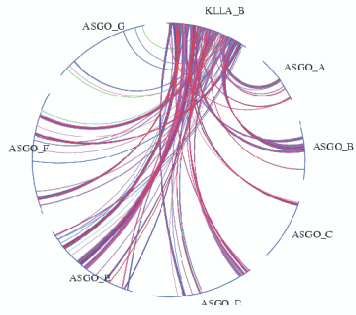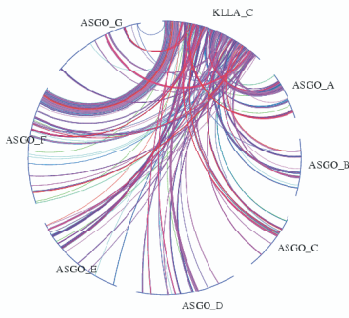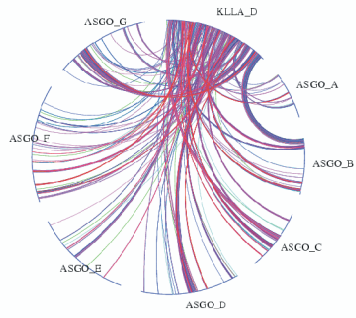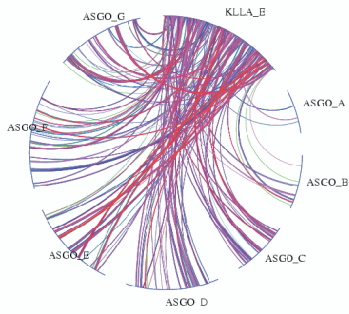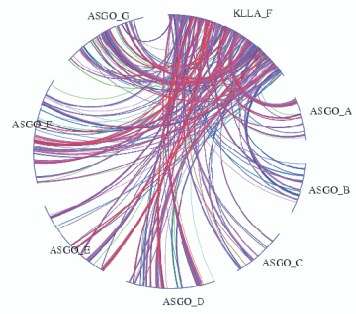

Supplement: pgen.0020032.sg002.pdf [file pgen.0020032.sg002.pdf]

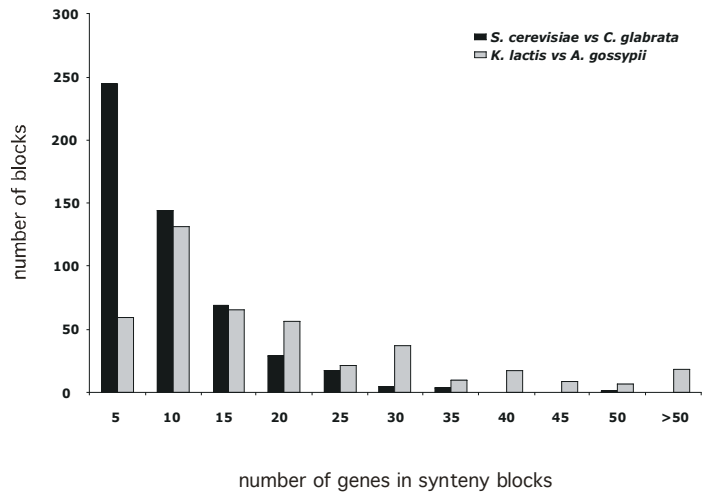

Supplement: pgen.0020032.sg003.pdf [file pgen.0020032.sg003.pdf]
